# Supplementary material
Source: MDPI journal article supplement (https://www.mdpi.com/2072-4292/15/5/1402)
Supplement: s1 [file s1]

## Supporting Information

# Detection of Soil Erosion Hotspots in the Croplands of a Typical Black Soil Region in Northeast China: Insights from Sentinel-2 Multispectral Remote Sensing

Lulu Qi <sup>1,2</sup>, Pu Shi <sup>1,2,\*</sup>, Klara Dvorakova <sup>2</sup>, Kristof Van Oost <sup>2</sup>, Qi Sun <sup>1</sup>, Hanqing Yu <sup>3</sup> and Bas van Wesemael <sup>2</sup>

<sup>1</sup> College of Earth Sciences, Jilin University, Changchun 130061, China

<sup>2</sup> Earth and Life Institute, UCLouvain, 1348 Louvain-la-Neuve, Belgium

<sup>3</sup> Institute of Environment and Sustainable Development in Agriculture, Chinese Academy of Agricultural Sciences, 100081 Beijing

\* Correspondence: shipu@jlu.edu.cn

## Estimation of soil erosion rates based on $^{137}\text{Cs}$ inventory conversion model

We used the Simplified Mass Balance Model (SMBM) to convert  $^{137}\text{Cs}$  inventory to net erosion rates ( $\text{t ha}^{-1} \text{ yr}^{-1}$ ). First, the  $^{137}\text{Cs}$  reference inventory was corrected to the sampling year according to Equation (1):

$$N_{2021} = N_s \left( \frac{1}{2} \right)^{\frac{2021-s}{30.12}} \quad (1)$$

where  $N_{2021}$  is the reference inventory of  $^{137}\text{Cs}$  corrected to 2021 ( $\text{Bq m}^{-2}$ ),  $N_s$  is the reference inventory ( $\text{Bq m}^{-2}$ ) in the sampling year.

Second, Equation (2) was used to calculate the  $^{137}\text{Cs}$  loss ratio:

$$C_{SL} = \frac{A_{ref} - A}{A_{ref}} \quad (2)$$

where  $C_{SL}$  is the  $^{137}\text{Cs}$  loss ratio,  $A_{ref}$  is the local  $^{137}\text{Cs}$  reference inventory ( $\text{Bq m}^{-2}$ ), and  $A$  is the measured  $^{137}\text{Cs}$  inventory at the sampling site ( $\text{Bq m}^{-2}$ ).

Finally, SMBM was used to estimate the net erosion rates for all the collected soil samples at three slope positions:

$$SL = \frac{10Bd \left( 1 - (1 - C_{SL})^{\frac{1}{T}} \right)}{P} \quad (3)$$

where  $SL$  is the mean annual soil loss ( $\text{t ha}^{-1} \text{ yr}^{-1}$ ),  $B$  is the soil bulk density ( $\text{kg m}^{-3}$ ),  $d$  is the depth of the plow layer (m),  $P$  is the particle size correction factor defined as the ratio of the  $^{137}\text{Cs}$  concentration of mobilized sediments to that of the original soils, the median (2.14) of the range recommended by Walling and He (1.78-2.5) was used in this study, and  $T$  is the time elapsed since the initiation of  $^{137}\text{Cs}$  accumulation (yr).

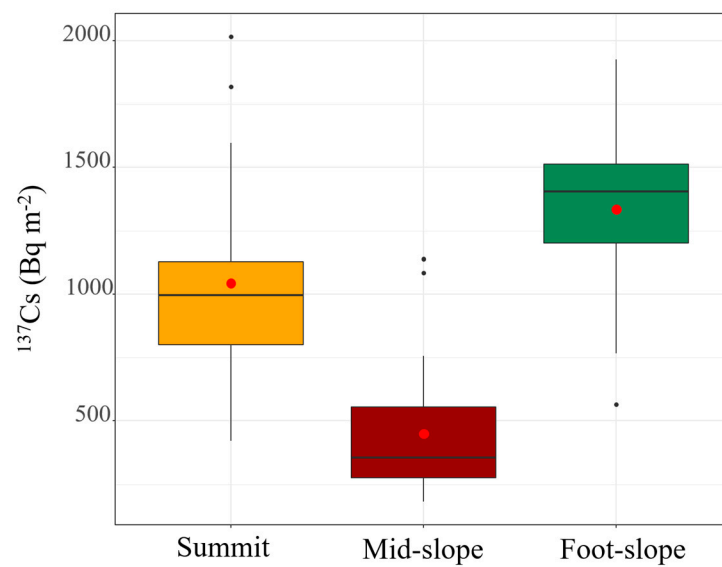

Figure S1.  $^{137}\text{Cs}$  inventory at Summit, Mid-slope, and Foot-slope positions. Red dots indicate average value per group.

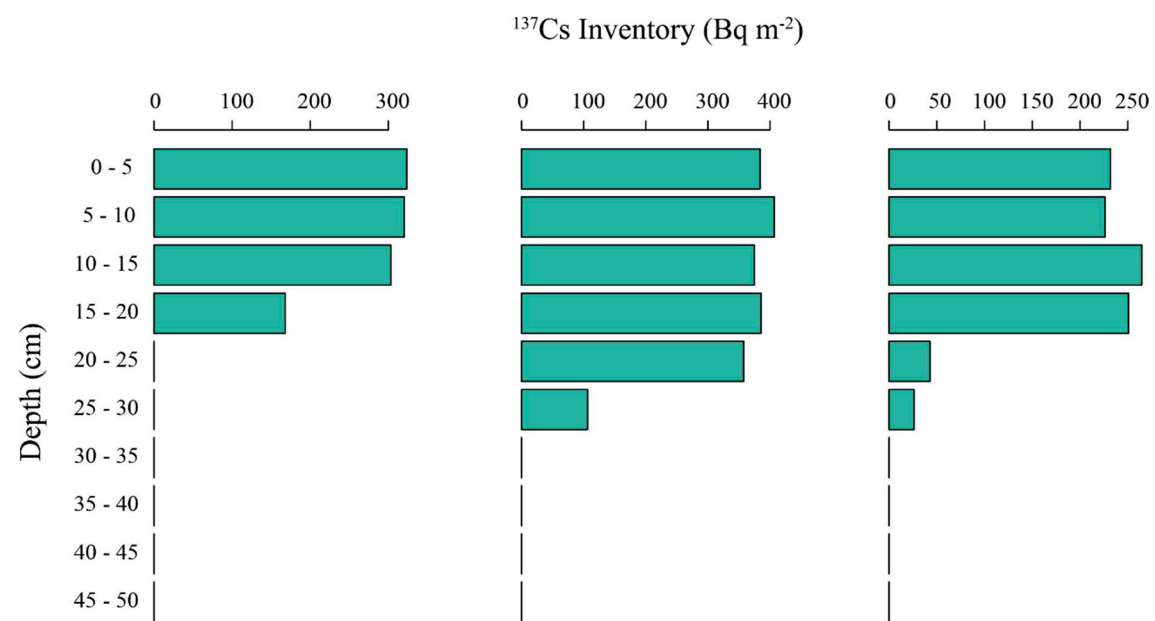

Figure S2. Vertical distribution of  $^{137}\text{Cs}$  inventory of the three soil pits at Summit positions.
